# Supplementary material for: De Novo Assembly of Transcriptome and Development of Novel EST-SSR Markers in Rhododendron rex Lévl. through Illumina Sequencing
Source: PubMed Central journal article supplement (PMC5622969; doi:10.3389/fpls.2017.01664), 2017-09-26

## *Supplementary Material*

**De novo assembly of transcriptome and development of novel EST-SSR markers in *Rhododendron rex* Lévl. through Illumina sequencing**

**Authors:** Yue Zhang, Xue Zhang, Yue-Hua Wang, Shi-Kang Shen\*

School of Life Sciences, Yunnan University, Kunming No. 2 Green lake  
North road Kunming, Yunnan, 650091, China.

**\*Correspondence author:** Shi-Kang Shen

**Supplementary Figure 3** Principal coordinates analysis (PCA) of 20 individuals from 4 populations of *R. rex*

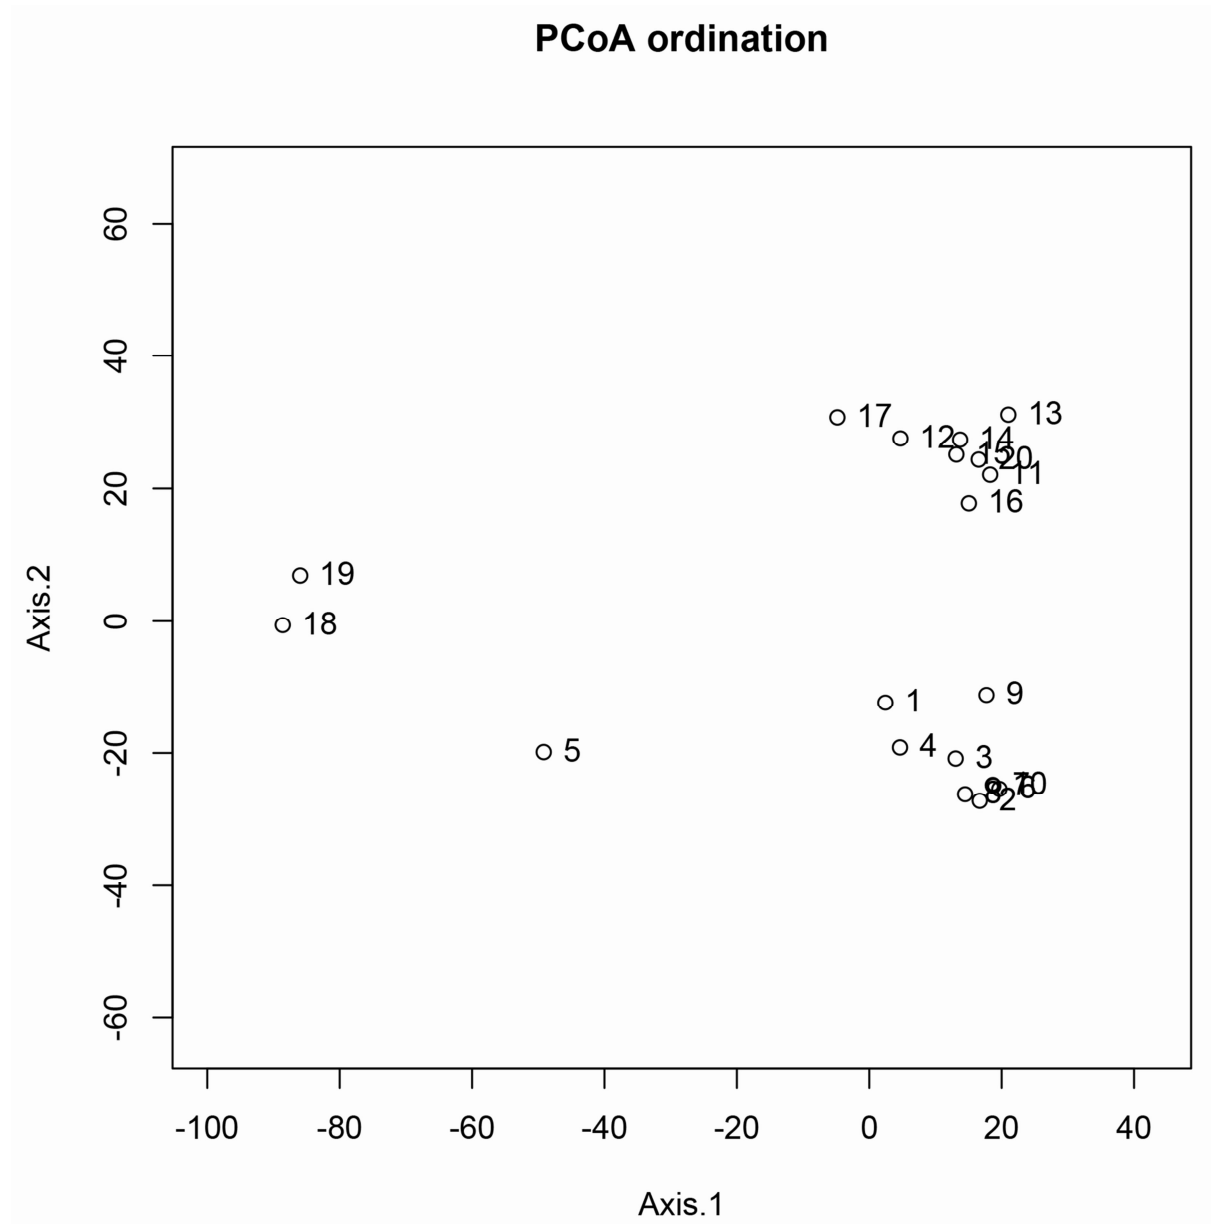

Supplement: Image3.pdf [file Image3.pdf]
